# Supplementary material for: Multicentre, double-blind, randomised, sham-controlled trial of 10 khz high-frequency spinal cord stimulation for chronic neuropathic low back pain (MODULATE-LBP): a trial protocol
Source: Springer Nature journal article supplement (doi:10.1186/s13063-019-3831-4), 2020-01-28
Supplement: MOESM1 [file 17603250]

Pain Management & Neuromodulation Centre  
 Ground Floor, Lambeth Wing  
**St Thomas' Hospital**  
 Westminster Bridge Road  
 London SE1 7EH

Department: 020 7188 4716  
 Fax: 020 7188 4719  
 Main Switchboard: 020 7188 7188

INFORMED CONSENT FORM

Sponsor: Guy's and St Thomas' NHS Foundation Trust  
 Protocol number: Modulate-LBP v1.2 18<sup>th</sup> December 2018  
 Ethics Committee reference number: 18/LO/1031

Investigator: Dr Adnan Al-Kaisy  
 IRAS ID: 232729

|                         |                                                                                                                                                           |                       |                    |
|-------------------------|-----------------------------------------------------------------------------------------------------------------------------------------------------------|-----------------------|--------------------|
| <b>Study Title:</b>     | <b>Multicentre, Double Blind, Randomised Sham-Controlled Trial of 10 kHz High-Frequency Spinal Cord Stimulation for Chronic Neuropathic Low Back Pain</b> |                       |                    |
| <b>Protocol Number:</b> | <b>V1.2 18.DEC.2018</b>                                                                                                                                   |                       |                    |
| <b>Subject Number:</b>  | 01 ____                                                                                                                                                   | <b>Date of Birth:</b> | ____ / ____ / ____ |

|                                                                                                                                                                                                                                                                                                                                                                | Patient Initials |
|----------------------------------------------------------------------------------------------------------------------------------------------------------------------------------------------------------------------------------------------------------------------------------------------------------------------------------------------------------------|------------------|
| I confirm that I have read and understand the information in the patient information sheet (Version 1.9 dated 18 <sup>th</sup> of December 2018) for the above named study. I have had sufficient time, the opportunity to consider the information, ask questions and have had these questions answered satisfactorily.                                       |                  |
| I understand that my participation is voluntary and that I am free to withdraw at any time, without giving any reason, and without my medical care, treatment or legal rights being affected.                                                                                                                                                                  |                  |
| I understand that relevant sections of my medical notes and data collected during the study may be looked at by responsible and designated individuals from Guy's and St. Thomas NHS Foundation Trust or regulatory authorities, where it is relevant to my participation in this study. I give permission for these individuals to have access to my records. |                  |
| I understand all information collected about me will be kept confidential                                                                                                                                                                                                                                                                                      |                  |

INFORMED CONSENT FORM

Sponsor: Guy's and St Thomas' NHS Foundation Trust  
Protocol number: Modulate-LBP v1.2 18<sup>th</sup> December 2018  
Ethics Committee reference number: 18/LO/1031

Investigator: Dr Adnan Al-Kaisy  
IRAS ID: 232729

|                                                                                                                                                                                                                   | Patient Initials |
|-------------------------------------------------------------------------------------------------------------------------------------------------------------------------------------------------------------------|------------------|
| I agree to my GP being informed of my participation in the study                                                                                                                                                  |                  |
| I consent to being contacted about future research projects                                                                                                                                                       |                  |
| I consent that my data being shared with Exeter clinical trial unit and other collaborators some of which may be outside of the UK                                                                                |                  |
| I freely and voluntarily consent to participate in the study                                                                                                                                                      |                  |
| I understand that I will receive a signed copy of this consent and authorisation form. I also understand that a copy of the consent form will be filed with my medical records and a copy with the research team. |                  |

Three copies of this consent form must be signed and dated by you and the investigator:

**Site File Copy**

|                                                   |                   |              |
|---------------------------------------------------|-------------------|--------------|
| <b>Name of Participant:</b>                       | <b>Signature:</b> | <b>Date:</b> |
|                                                   |                   |              |
| <b>Name of Person Obtaining Informed Consent:</b> | <b>Signature:</b> | <b>Date:</b> |
|                                                   |                   |              |

INFORMED CONSENT FORM

Sponsor: Guy's and St Thomas' NHS Foundation Trust  
 Protocol number: Modulate-LBP v1.2 18<sup>th</sup> December 2018  
 Ethics Committee reference number: 18/LO/1031

Investigator: Dr Adnan Al-Kaisy  
 IRAS ID: 232729

**Study Overview:** **Multicentre, Double Blind, Randomised Sham-Controlled Trial of 10kHz High- Frequency Spinal Cord Stimulation for Chronic Neuropathic Low Back Pain (MODULATE-LBP)**

**Patient ID:** \_\_\_\_\_

**Informed Consent Process**

|                                                                                                  |                                                    |
|--------------------------------------------------------------------------------------------------|----------------------------------------------------|
| 1. The subject was given adequate information concerning the study                               | <input type="radio"/> Yes <input type="radio"/> No |
| 2. The subject was provided adequate opportunity to consider all options                         | <input type="radio"/> Yes <input type="radio"/> No |
| 3. All of the subject's questions were responded to                                              | <input type="radio"/> Yes <input type="radio"/> No |
| 4. The subject comprehended the information given to him                                         | <input type="radio"/> Yes <input type="radio"/> No |
| 5. The subject personally signed and dated                                                       | <input type="radio"/> Yes <input type="radio"/> No |
| 6. The subject received a signed copy of the informed consent form and patient information sheet | <input type="radio"/> Yes <input type="radio"/> No |
| 7. The informed consent process occurred prior to study related activities beginning             | <input type="radio"/> Yes <input type="radio"/> No |
| 8. The subject is eligible according to the Inclusion/Exclusion criteria of the study            | <input type="radio"/> Yes <input type="radio"/> No |

**I (study coordinator) witnessed the patient has been informed to these guidelines**

**Sign:** \_\_\_\_\_

**Print:** \_\_\_\_\_

**Date:** \_\_ / \_\_ / \_\_
